# Supplementary material for: Patient-Level Prediction of Cardio-Cerebrovascular Events in Hypertension Using Nationwide Claims Data
Source: PubMed Central journal article supplement (PMC6396076; doi:10.2196/11757), 2019-02-15
Supplement: jmir_v21i2e11757_app1.pdf [file jmir_v21i2e11757_app1.pdf]

## Multimedia Appendix 1. Details of Dataset

**Table S1. Details of dataset**

|           |                  | Sample Cohort DB [1]                                                                                                                                                                                                                                                                                                                                                                                                                                             | Medical Check-up cohort DB [2]                                                                          |
|-----------|------------------|------------------------------------------------------------------------------------------------------------------------------------------------------------------------------------------------------------------------------------------------------------------------------------------------------------------------------------------------------------------------------------------------------------------------------------------------------------------|---------------------------------------------------------------------------------------------------------|
| Details   | Sample standard  | Qualified individuals as of 2002                                                                                                                                                                                                                                                                                                                                                                                                                                 | Qualified individuals as of 2002 in the age of 40-79 in 2002-2003 who received general medical check-up |
|           | Duration         | 2002-2013 (12 years)                                                                                                                                                                                                                                                                                                                                                                                                                                             | 2002-2013 (12 years)                                                                                    |
|           | Contents         | <ul style="list-style-type: none"> <li>- Social &amp; economic qualification variables (including death and disability)</li> <li>- Status of medical resource utilization</li> <li>- Status of clinic</li> </ul>                                                                                                                                                                                                                                                 |                                                                                                         |
| Variables | Qualification    | Health insurance subscribers and Medicare recipients (excluding foreigners) <ul style="list-style-type: none"> <li>- Total of 14 variables including gender, age, location, type of subscription, social economic variable of the subject such as income rank, disability, death, and etc.</li> </ul>                                                                                                                                                            |                                                                                                         |
|           | Treatment        | Payment data to the clinic upon and treatment of subjects at the clinic <ul style="list-style-type: none"> <li>- Total of 57 variables including date, expenses of treatment, common statement, treatment, type of disease (ICD-10), and prescription: 28 variables in statement, 13 variables in details of treatment, 5 variables in type of disease, and 11 variables in details of prescription.</li> </ul>                                                  |                                                                                                         |
|           | Medical check-up | Major results from medical check-up and behavior and habitual data from questionnaire. Including primary general medical check-up data and transition period check-up data from 2008 <ul style="list-style-type: none"> <li>- Total of 37 variables in 2002-2008 and 41 variables in 2009-2013</li> <li>- Including BMI, systolic blood pressure, diastolic blood pressure, fasting blood sugar level, total cholesterol, smoking, drinking, and etc.</li> </ul> |                                                                                                         |
|           | Clinic           | Status, facility, equipment, and personnel data of clinics by type, establishment, and location (city and state). <ul style="list-style-type: none"> <li>- Total 10 variables</li> </ul>                                                                                                                                                                                                                                                                         |                                                                                                         |

## References

[1] Details of DB and cost: Sample Cohort DB: National Health Insurance Service 2014 [cited 2018]. URL: <https://nhiss.nhis.or.kr/bd/ab/bdaba022eng.do>. Archived at: <http://www.webcitation.org/71DHTmfsp>.

[2] Details of DB and cost: Medical check-up cohort DB: National Health Insurance Service 2014 [cited 2018]. URL: <https://nhiss.nhis.or.kr/bd/ab/bdaba022Heng.do>. Archived at: <http://www.webcitation.org/73WT9ejw>.
