# Supplementary material for: Patient-Level Prediction of Cardio-Cerebrovascular Events in Hypertension Using Nationwide Claims Data
Source: PubMed Central journal article supplement (PMC6396076; doi:10.2196/11757), 2019-02-15
Supplement: jmir_v21i2e11757_app2.pdf [file jmir_v21i2e11757_app2.pdf]

**Multimedia Appendix 2. Anatomical therapeutic chemical codes for subject definition.**

**Table S2 The list of ATC Codes for subject definition**

| Hypertension |         |         |         | Cardiovascular |
|--------------|---------|---------|---------|----------------|
| C07AG        | C08CA04 | C09AA03 | C09DB06 | B01AC04        |
| C07AG02      | C08CA05 | C09AA13 | C09DB02 | B01AC24        |
| C07AG01      | C08DA01 | C09BA04 | C09DX03 | B01AC22        |
| C02CA04      | C08CA12 | C09AA15 | C09DB04 |                |
| C01CA17      | C08CA15 | C09CA06 | C09DB01 |                |
| G04CA02      | C08CA14 | C09CA02 | C09DB   |                |
| G04CA01      | C08CA   | C09CA   | C03DB01 |                |
| G04CA        | C08CA02 | C09CA04 | C03CA01 |                |
| G04CA04      | C09BB05 | C09CA01 | C03AA03 |                |
| G04CA03      | C08CA09 | C09CA08 | C03DA01 |                |
| C07AB03      | C08CA13 | C09CA07 | C03CA04 |                |
| C07AB07      | C08CA11 | C09CA03 | C03BA04 |                |
| C07AB09      | C08CA07 | C09DA06 | C03EA01 |                |
| C07AB02      | C09AA01 | C09DA02 | C03BA11 |                |
| C07AB12      | C09AA02 | C09DA   |         |                |
| C07AA05      | C09AA16 | C09DA04 |         |                |
| C07AA07      | C09AA04 | C09DA01 |         |                |
| C07AB05      | C09AA05 | C09DA08 |         |                |
| C08CA01      | C09AA   | C09DA07 |         |                |
| C08DB01      | C09AA08 | C09DA03 |         |                |
