# Supplementary material for: Patient-Level Prediction of Cardio-Cerebrovascular Events in Hypertension Using Nationwide Claims Data
Source: PubMed Central journal article supplement (PMC6396076; doi:10.2196/11757), 2019-02-15
Supplement: jmir_v21i2e11757_app3.pdf [file jmir_v21i2e11757_app3.pdf]

### Multimedia Appendix 3. List of features.

**Table S3. The average and median values of top 55 features for the groups.**

|    | Features      | Description                                              | Patients with hypertension only |       |        | Patients with cardio-, cerebrovascular outcome |       |       |
|----|---------------|----------------------------------------------------------|---------------------------------|-------|--------|------------------------------------------------|-------|-------|
|    |               |                                                          | median                          | mean  | SD     | median                                         | mean  | SD    |
| 1  | ATC_C09       | Agents acting on the renin-angiotensin system            | 7                               | 22.1  | 29.3   | 1                                              | 7.2   | 13.9  |
| 2  | ATC_M09       | Other drugs for disorders of the musculo-skeletal system | 9                               | 13.9  | 17.7   | 2                                              | 6.3   | 11.7  |
| 3  | I10           | Essential Hypertension                                   | 34                              | 38.4  | 36.5   | 5                                              | 12.7  | 17.4  |
| 4  | ATC_C09_ days | Agents acting on the renin-angiotensin system            | 208                             | 778   | 962.7  | 6                                              | 221.1 | 424.7 |
| 5  | ATC_M09_ days | Other drugs for disorders of the musculo-skeletal system | 29                              | 56.4  | 95.8   | 7                                              | 23.9  | 55.3  |
| 6  | ATC_R07_ days | Other respiratory system products                        | 0                               | 1.5   | 7      | 0                                              | 0.2   | 3.4   |
| 7  | ATC_R07       | Other respiratory system products                        | 0                               | 0.4   | 1.4    | 0                                              | 0     | 0.4   |
| 8  | ATC_C10_ days | Lipid modifying agents                                   | 0                               | 348.9 | 681.9  | 0                                              | 105   | 292.6 |
| 9  | ATC_C10       | Lipid modifying agents                                   | 0                               | 9.8   | 20.2   | 0                                              | 3.4   | 9.8   |
| 10 | J20           | Acute bronchitis                                         | 1                               | 3.7   | 6.7    | 0                                              | 1.6   | 3.6   |
| 11 | ATC_B01       | Antithrombotic agents                                    | 0                               | 10.7  | 21     | 0                                              | 4     | 10.7  |
| 12 | ATC_B01_ days | Antithrombotic agents                                    | 0                               | 365.1 | 695    | 0                                              | 120.3 | 322.7 |
| 13 | ATC_R06       | Antihistamines for systemic use                          | 6                               | 28.3  | 42.6   | 1                                              | 15    | 28.7  |
| 14 | ATC_C08       | Agents acting on the renin-angiotensin system            | 11                              | 26.9  | 33.1   | 3                                              | 10.9  | 17    |
| 15 | ATC_R06_ days | Antihistamines for systemic use                          | 49                              | 120.9 | 282    | 18                                             | 63.7  | 177.5 |
| 16 | ATC_H02       | Corticosteroids for systemic use                         | 1                               | 12.1  | 20.4   | 0.0                                            | 6.7   | 13.2  |
| 17 | ATC_S01       | Ophthalmologicals                                        | 0                               | 9.3   | 20.1   | 0.0                                            | 5.1   | 12.5  |
| 18 | ATC_C04_ days | Peripheral vasodilators                                  | 0                               | 71.2  | 251.8  | 0.0                                            | 28.0  | 118.4 |
| 19 | K21           | Gastro-esophageal reflux disease                         | 0                               | 1.6   | 4.9    | 0.0                                            | 0.7   | 2.7   |
| 20 | ATC_C08_ days | Agents acting on the renin-angiotensin system            | 331                             | 896.1 | 1034.0 | 45.0                                           | 314.8 | 488.3 |
| 21 | ATC_H02_ days | Corticosteroids for systemic use                         | 3                               | 51.5  | 199.2  | 0.0                                            | 26.9  | 106.8 |
| 22 | ATC_J01       | Antibacterials for systemic use                          | 7                               | 24.1  | 28.4   | 2.0                                            | 14.5  | 21.2  |
| 23 | J30           | Vasomotor and allergic rhinitis                          | 0                               | 1.3   | 4.0    | 0.0                                            | 0.5   | 2.2   |

|    |               |                                                                           |     |       |       |     |       |       |
|----|---------------|---------------------------------------------------------------------------|-----|-------|-------|-----|-------|-------|
| 24 | ATC_R01_ days | Nasal preparations                                                        | 0   | 16.1  | 44.2  | 0.0 | 8.9   | 28.8  |
| 25 | ATC_C04       | Peripheral vasodilators                                                   | 0   | 3.2   | 10.6  | 0.0 | 1.5   | 5.1   |
| 26 | ATC_D07       | Corticosteroids, dermatological preparations                              | 0   | 3.2   | 9.1   | 0.0 | 1.7   | 5.7   |
| 27 | ATC_R05       | Cough and cold preparations                                               | 5   | 27.6  | 38.7  | 1.0 | 16.5  | 29.0  |
| 28 | ATC_S01_ days | Ophthalmologicals                                                         | 0   | 30.0  | 119.7 | 0.0 | 13.2  | 49.9  |
| 29 | ATC_J02_ days | Antimycotics for systemic use                                             | 0   | 9.6   | 29.8  | 0.0 | 4.5   | 17.4  |
| 30 | ATC_G04_ days | Urologicals                                                               | 0   | 99.5  | 458.0 | 0.0 | 43.5  | 237.1 |
| 31 | ATC_M01_ days | Anti-inflammatory and antirheumatic products                              | 126 | 301.9 | 523.2 | 65  | 184.4 | 346.5 |
| 32 | ATC_D06       | Antibiotics and chemotherapeutics for dermatological use                  | 0   | 0.6   | 1.7   | 0   | 0.3   | 1.2   |
| 33 | M54           | Dorsalgia                                                                 | 1   | 7.0   | 24.4  | 0   | 3.7   | 14.2  |
| 34 | ATC_A05       | Bile and liver therapy                                                    | 0   | 4.1   | 14.2  | 0   | 2.4   | 10.2  |
| 35 | H10           |                                                                           | 0   | 1.2   | 3.5   | 0   | 0.6   | 2.3   |
| 36 | ATC_M03       | Muscle relaxants                                                          | 6   | 13.9  | 25.6  | 3   | 9.8   | 20.0  |
| 37 | ATC_A03_ days | Drugs for functional gastrointestinal disorders                           | 139 | 322.2 | 542.4 | 73  | 210.5 | 393.2 |
| 38 | ATC_R03_ days | Drugs for obstructive airway diseases                                     | 4   | 57.3  | 351.0 | 0   | 41.3  | 245.7 |
| 39 | ATC_B02       | Antihemorrhagics                                                          | 0   | 0.6   | 2.0   | 0   | 0.3   | 1.5   |
| 40 | ATC_D06_ days | Antibiotics and chemotherapeutics for dermatological use                  | 0   | 0.8   | 3.2   | 0   | 0.4   | 2.3   |
| 41 | ATC_A12       | Mineral supplements                                                       | 0   | 1.8   | 7.5   | 0   | 0.8   | 4.1   |
| 42 | M17           | Osteoarthritis of knee                                                    | 0   | 6.8   | 22.1  | 0   | 3.5   | 12.6  |
| 43 | J01           | Acute sinusitis                                                           | 0   | 0.6   | 2.6   | 0   | 0.2   | 1.3   |
| 44 | K29           | Gastritis and duodenitis                                                  | 1   | 2.5   | 6.1   | 0   | 1.5   | 4.1   |
| 45 | H04           | Disorders of lacrimal system                                              | 0   | 1.1   | 3.5   | 0   | 0.5   | 2.2   |
| 46 | M77           | Other enthesopathies                                                      | 0   | 0.7   | 3.8   | 0   | 0.2   | 2.1   |
| 47 | J40           | Bronchitis, not specified as acute or chronic                             | 0   | 0.63  | 2.7   | 0   | 0.2   | 1.4   |
| 48 | ATC_J05_ days | Antivirals for systemic use                                               | 0   | 14.9  | 168.0 | 0   | 4.2   | 58.7  |
| 49 | ATC_A07_ days | Antidiarrheals, intestinal anti-inflammatory/anti-infective agents        | 7   | 39.1  | 154.7 | 3   | 26.0  | 101.8 |
| 50 | S33           | Dislocation and sprain of joints and ligaments of lumbar spine and pelvis | 0   | 1.3   | 5.9   | 0   | 0.7   | 4.7   |
| 51 | AGE           | Age                                                                       | 56  | 57    | 9.1   | 60  | 60.4  | 9.5   |

|    |         |                                       |   |     |      |   |     |      |
|----|---------|---------------------------------------|---|-----|------|---|-----|------|
| 52 | S61     | Open wound of wrist, hand and fingers | 0 | 0.3 | 1.5  | 0 | 0.1 | 0.8  |
| 53 | J02     | Acute pharyngitis                     | 0 | 1.0 | 2.9  | 0 | 0.5 | 1.9  |
| 54 | ATC_J05 | Antivirals for systemic use           | 0 | 1   | 4.5  | 0 | 0.5 | 2.2  |
| 55 | ATC_R03 | Drugs for obstructive airway diseases | 2 | 7.6 | 30.1 | 0 | 5.5 | 22.2 |

Note: All features beginning with ATC are related to the medication, and the features containing 'days' at the end refer to the feature for the number of days of a medication.

**Table S4. Significant feature list**

| Rank | Feature      | Rank | Feature      | Rank | Feature      | Rank | Feature      | Rank | Feature   |
|------|--------------|------|--------------|------|--------------|------|--------------|------|-----------|
| 56   | ATC_M01_days | 156  | ATC_A11_days | 256  | ATC_G03_days | 356  | D22          | 456  | N81       |
| 57   | ATC_D06      | 157  | ATC_M02_days | 257  | T14          | 357  | ATC_N04_days | 457  | D30       |
| 58   | M54          | 158  | J36          | 258  | N60          | 358  | N93          | 458  | N89       |
| 59   | ATC_A05      | 159  | D23          | 259  | ATC_S02_days | 359  | D64          | 459  | M85       |
| 60   | H10          | 160  | S23          | 260  | D21          | 360  | N48          | 460  | S97       |
| 61   | ATC_M03      | 161  | I83          | 261  | K05          | 361  | R35          | 461  | R59       |
| 62   | ATC_A03_days | 162  | M72          | 262  | R07          | 362  | R87          | 462  | G24       |
| 63   | ATC_R03_days | 163  | ATC_A11      | 263  | T25          | 363  | K57          | 463  | H53       |
| 64   | ATC_B02      | 164  | ATC_M04_days | 264  | J45          | 364  | U23          | 464  | J84       |
| 65   | ATC_D06_days | 165  | M53          | 265  | R52          | 365  | S02          | 465  | E55       |
| 66   | ATC_A12      | 166  | R73          | 266  | E05          | 366  | H18          | 466  | S64       |
| 67   | M17          | 167  | ATC_A01_days | 267  | R11          | 367  | ATC_C02      | 467  | M40       |
| 68   | J01          | 168  | S80          | 268  | H90          | 368  | H92          | 468  | S68       |
| 69   | K29          | 169  | J31          | 269  | J98          | 369  | E06          | 469  | H47       |
| 70   | H04          | 170  | ATC_N03      | 270  | H91          | 370  | G25          | 470  | S44       |
| 71   | M77          | 171  | ATC_B06      | 271  | H93          | 371  | S09          | 471  | R98       |
| 72   | J40          | 172  | J37          | 272  | N84          | 372  | D14          | 472  | T59       |
| 73   | ATC_J05_days | 173  | M23          | 273  | T22          | 373  | F43          | 473  | U50       |
| 74   | ATC_A07_days | 174  | H01          | 274  | S66          | 374  | M80          | 474  | R41       |
| 75   | S33          | 175  | N64          | 275  | S51          | 375  | H34          | 475  | M41       |
| 76   | AGE          | 176  | S60          | 276  | H68          | 376  | T20          | 476  | INPATIENT |
| 77   | S61          | 177  | D34          | 277  | E14          | 377  | K83          | 477  | D15       |
| 78   | J02          | 178  | J38          | 278  | T63          | 378  | ATC_A04_days | 478  | T79       |
| 79   | ATC_J05      | 179  | ATC_M04      | 279  | ATC_J04_days | 379  | S76          | 479  | Q76       |
| 80   | ATC_R03      | 180  | D13          | 280  | ATC_P01_days | 380  | D69          | 480  | H05       |
| 81   | M48          | 181  | G56          | 281  | K75          | 381  | N73          | 481  | T60       |
| 82   | ATC_B02_days | 182  | D17          | 282  | H19          | 382  | S72          | 482  | J47       |
| 83   | ATC_V03_days | 183  | J39          | 283  | M60          | 383  | K74          | 483  | G55       |
| 84   | ATC_A07      | 184  | K30          | 284  | K35          | 384  | R96          | 484  | T75       |

|     |              |     |              |     |              |     |              |     |     |
|-----|--------------|-----|--------------|-----|--------------|-----|--------------|-----|-----|
| 85  | D12          | 185 | ATC_M02      | 285 | M22          | 385 | R68          | 485 | H44 |
| 86  | M25          | 186 | ATC_C05      | 286 | J15          | 386 | R00          | 486 | J46 |
| 87  | ATC_M05      | 187 | ATC_A16      | 287 | T24          | 387 | H62          | 487 | D06 |
| 88  | N40          | 188 | T17          | 288 | G57          | 388 | U24          | 488 | M05 |
| 89  | J04          | 189 | S05          | 289 | S86          | 389 | R80          | 489 | J80 |
| 90  | J00          | 190 | E03          | 290 | H57          | 390 | N42          | 490 | H21 |
| 91  | H00          | 191 | M67          | 291 | R63          | 391 | K70          | 491 | N91 |
| 92  | S63          | 192 | H43          | 292 | F00          | 392 | R17          | 492 | T33 |
| 93  | H52          | 193 | N20          | 293 | R42          | 393 | ATC_L04      | 493 | M12 |
| 94  | S93          | 194 | S92          | 294 | K92          | 394 | S06          | 494 | D01 |
| 95  | H16          | 195 | J35          | 295 | ATC_P01      | 395 | S41          | 495 | N80 |
| 96  | ATC_C07      | 196 | ATC_R02      | 296 | R92          | 396 | J05          | 496 | D48 |
| 97  | H60          | 197 | H65          | 297 | ATC_A16_days | 397 | K61          | 497 | M46 |
| 98  | ATC_L01      | 198 | H66          | 298 | ATC_J04      | 398 | D05          | 498 | S65 |
| 99  | I84          | 199 | R05          | 299 | U30          | 399 | N28          | 499 | N07 |
| 100 | M51          | 200 | N95          | 300 | J09          | 400 | S96          | 500 | O86 |
| 101 | K58          | 201 | N39          | 301 | S30          | 401 | D18          | 501 | D11 |
| 102 | M19          | 202 | S81          | 302 | T78          | 402 | K13          | 502 | R09 |
| 103 | ATC_L02_days | 203 | ATC_B03      | 303 | S32          | 403 | ATC_A09      | 503 | U62 |
| 104 | J32          | 204 | K12          | 304 | R12          | 404 | T18          | 504 | K07 |
| 105 | H11          | 205 | R91          | 305 | K80          | 405 | H36          | 505 | R43 |
| 106 | K59          | 206 | G53          | 306 | S70          | 406 | R20          | 506 | E83 |
| 107 | ATC_C03      | 207 | H61          | 307 | N63          | 407 | R72          | 507 | M61 |
| 108 | ATC_L01_days | 208 | R19          | 308 | ATC_A04      | 408 | F32          | 508 | M93 |
| 109 | S01          | 209 | R31          | 309 | I73          | 409 | I70          | 509 | D33 |
| 110 | ATC_M05_days | 210 | M43          | 310 | M20          | 410 | N83          | 510 | G31 |
| 111 | M50          | 211 | K25          | 311 | E13          | 411 | N13          | 511 | R74 |
| 112 | S43          | 212 | ATC_C01      | 312 | F41          | 412 | K71          | 512 | K27 |
| 113 | J22          | 213 | R94          | 313 | J33          | 413 | H69          | 513 | E88 |
| 114 | ATC_G01      | 214 | S22          | 314 | H73          | 414 | N86          | 514 | G81 |
| 115 | H25          | 215 | SEX          | 315 | H02          | 415 | M96          | 515 | I88 |
| 116 | ATC_C07_days | 216 | D24          | 316 | E58          | 416 | R33          | 516 | Q61 |
| 117 | ATC_B06_days | 217 | ATC_D02      | 317 | H20          | 417 | T30          | 517 | E02 |
| 118 | N30          | 218 | S53          | 318 | R99          | 418 | T31          | 518 | T54 |
| 119 | J21          | 219 | N41          | 319 | S50          | 419 | ATC_D11_days | 519 | S57 |
| 120 | S83          | 220 | M24          | 320 | N45          | 420 | R81          | 520 | K20 |
| 121 | ATC_N05      | 221 | S00          | 321 | K11          | 421 | F17          | 521 | U78 |
| 122 | ATC_C03_days | 222 | N31          | 322 | R93          | 422 | E12          | 522 | Q18 |
| 123 | H35          | 223 | M71          | 323 | H33          | 423 | D35          | 523 | D31 |
| 124 | E04          | 224 | S91          | 324 | S21          | 424 | T69          | 524 | G58 |
| 125 | ATC_N07      | 225 | ATC_R02_days | 325 | T81          | 425 | N32          | 525 | N43 |

|     |              |     |              |     |              |     |              |     |           |
|-----|--------------|-----|--------------|-----|--------------|-----|--------------|-----|-----------|
| 126 | ATC_N07_days | 226 | M10          | 326 | ATC_C02_days | 426 | ATC_A09_days | 526 | N22       |
| 127 | ATC_H03_days | 227 | T16          | 327 | S42          | 427 | D27          | 527 | H54       |
| 128 | E11          | 228 | H81          | 328 | I87          | 428 | K86          | 528 | J67       |
| 129 | N76          | 229 | S62          | 329 | K82          | 429 | T01          | 529 | E86       |
| 130 | M81          | 230 | J18          | 330 | S67          | 430 | K56          | 530 | D26       |
| 131 | R10          | 231 | R51          | 331 | K14          | 431 | N10          | 531 | J42       |
| 132 | ATC_H01_days | 232 | E07          | 332 | K81          | 432 | M89          | 532 | G46       |
| 133 | S46          | 233 | S82          | 333 | K26          | 433 | ATC_D11      | 533 | G43       |
| 134 | ATC_N05_days | 234 | J41          | 334 | N21          | 434 | E89          | 534 | N12       |
| 135 | ATC_A10      | 235 | N72          | 335 | D37          | 435 | H17          | 535 | R26       |
| 136 | ATC_A01      | 236 | S90          | 336 | M99          | 436 | N02          | 536 | U65       |
| 137 | ATC_B03_days | 237 | D50          | 337 | S40          | 437 | F06          | 537 | M16       |
| 138 | S13          | 238 | ATC_D02_days | 338 | R03          | 438 | M21          | 538 | U71       |
| 139 | M47          | 239 | M70          | 339 | R60          | 439 | D36          | 539 | K31       |
| 140 | J34          | 240 | K62          | 340 | N85          | 440 | N77          | 540 | S54       |
| 141 | ATC_L02      | 241 | T23          | 341 | N71          | 441 | OUTPATIENT   | 541 | F38       |
| 142 | ATC_A10_days | 242 | R22          | 342 | I15          | 442 | S31          | 542 | R76       |
| 143 | K76          | 243 | R04          | 343 | ATC_N04      | 443 | J11          | 543 | D38       |
| 144 | H40          | 244 | ATC_G03      | 344 | ATC_L04_days | 444 | M00          | 544 | R82       |
| 145 | ATC_C05_days | 245 | K60          | 345 | I46          | 445 | R25          | 545 | E00       |
| 146 | K52          | 246 | D25          | 346 | S71          | 446 | S03          | 546 | F89       |
| 147 | ATC_H03      | 247 | N34          | 347 | I11          | 447 | N75          | 547 | EMERGENCY |
| 148 | ATC_G01_days | 248 | ATC_S02      | 348 | M66          | 448 | F33          | 548 | Q45       |
| 149 | M62          | 249 | S73          | 349 | T00          | 449 | R55          | 549 | S10       |
| 150 | T15          | 250 | N87          | 350 | H15          | 450 | ATC_C01_days | 550 | D16       |
| 151 | H26          | 251 | F51          | 351 | G51          | 451 | K87          | 551 | I13       |
| 152 | ATC_H01      | 252 | K40          | 352 | I61          | 452 | T92          | 552 | R23       |
| 153 | M13          | 253 | S20          | 353 | R50          | 453 | R30          | 553 | D75       |
| 154 | S52          | 254 | G47          | 354 | D10          | 454 | H72          | 554 | K55       |
| 155 | ATC_N03_days | 255 | M76          | 355 | T21          | 455 | T84          | 555 | H06       |

Note: All features beginning with ATC are related to the medication, and the features containing 'days' at the end refer to the feature for the number of days of a medication.
