# Supplementary material for: Patient-Level Prediction of Cardio-Cerebrovascular Events in Hypertension Using Nationwide Claims Data
Source: PubMed Central journal article supplement (PMC6396076; doi:10.2196/11757), 2019-02-15
Supplement: jmir_v21i2e11757_app4.pdf [file jmir_v21i2e11757_app4.pdf]

#### Multimedia Appendix 4. Hyper-parameters used for training models.

After experimenting with various values, the following hyper-parameter setting produced the best performance. We implemented algorithms with Keras for LSTM and Scikit-Learn for Logistic regression, SVM, Decision Tree, Random Forest, and MLP.

**Table S5.** Hyper-parameter settings for training the models

| Model                         | Scikit-Learn/Keras     | Hyper-parameter                                                                               |
|-------------------------------|------------------------|-----------------------------------------------------------------------------------------------|
| Logistic regression           | LogisticRegression     | L2 regularization: 1.0                                                                        |
| SVM                           | LinearSVC              | loss:hinge, Max epoch: 100                                                                    |
| Decision Tree                 | DecisionTreeClassifier | max_depth: 10                                                                                 |
| Random Forest                 | RandomForestClassifier | Max_depth: 10, n_estimators:100                                                               |
| MLP with 55 features          | MLPClassifier          | Activation function: ReLU, Early_stopping:True, Hidden_layer_sizes :37, max_iter:20, alpha:2  |
| MLP with 278 features         | MLPClassifier          | Activation function: ReLU, Early_stopping:True, Hidden_layer_sizes :186, max_iter:20, alpha:2 |
| MLP with 555 features         | MLPClassifier          | Activation function: ReLU, Early_stopping:True, Hidden_layer_sizes :371, max_iter:20, alpha:2 |
| LSTM models with 55 features  | CuDNNLSTM              | Number of layers: 2, batch_size :128, epochs:15, number of steps:150                          |
| LSTM models with 258 features | CuDNNLSTM              | Number of layers: 1, batch_size:512, epochs:15, number of steps: 150                          |
| LSTM models with 555 features | CuDNNLSTM              | Number of layers: 1, batch_size: 64, epochs: 5, number of steps: 100                          |
